# Supplementary material for: Population Subdivision and Migration Assessment of Mangalica Pig Breeds Based on Pedigree Analysis
Source: MDPI journal article supplement (doi:10.3390/ani14040653), 2024-02-19
Supplement: s1 [file s1]

## Supplementary Materials

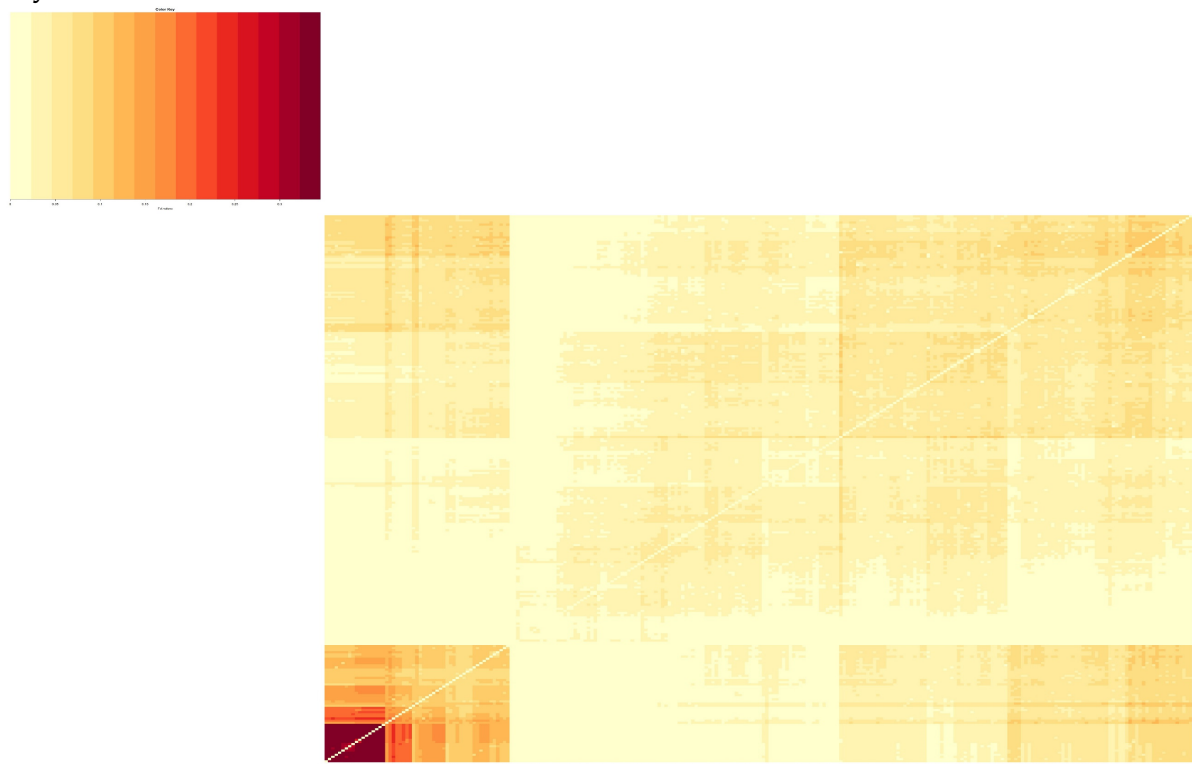

**Figure S1.** Heatmap based on pairwise  $F_{ST}$  coefficients between the herds of Blonde Mangalica breed. The color key legend ranging from yellowish to dark red represents the scale of  $F_{ST}$  coefficients from zero to onward. The x and y axis show herd name.

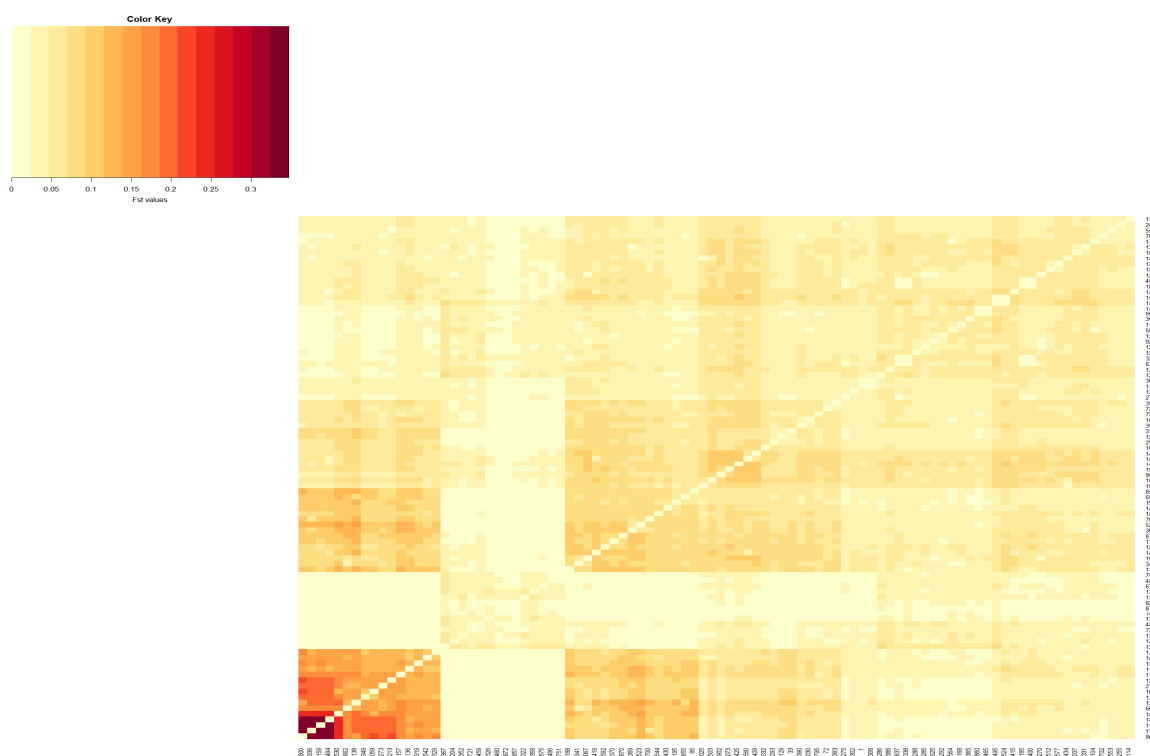

**Figure S2.** Heatmap based on pairwise  $F_{ST}$  coefficients between the herds of Swallow-Belly Mangalica breed. The color key legend ranging from yellowish to dark red represents the scale of  $F_{ST}$  coefficients from zero to onward. The x and y axis show herd name.

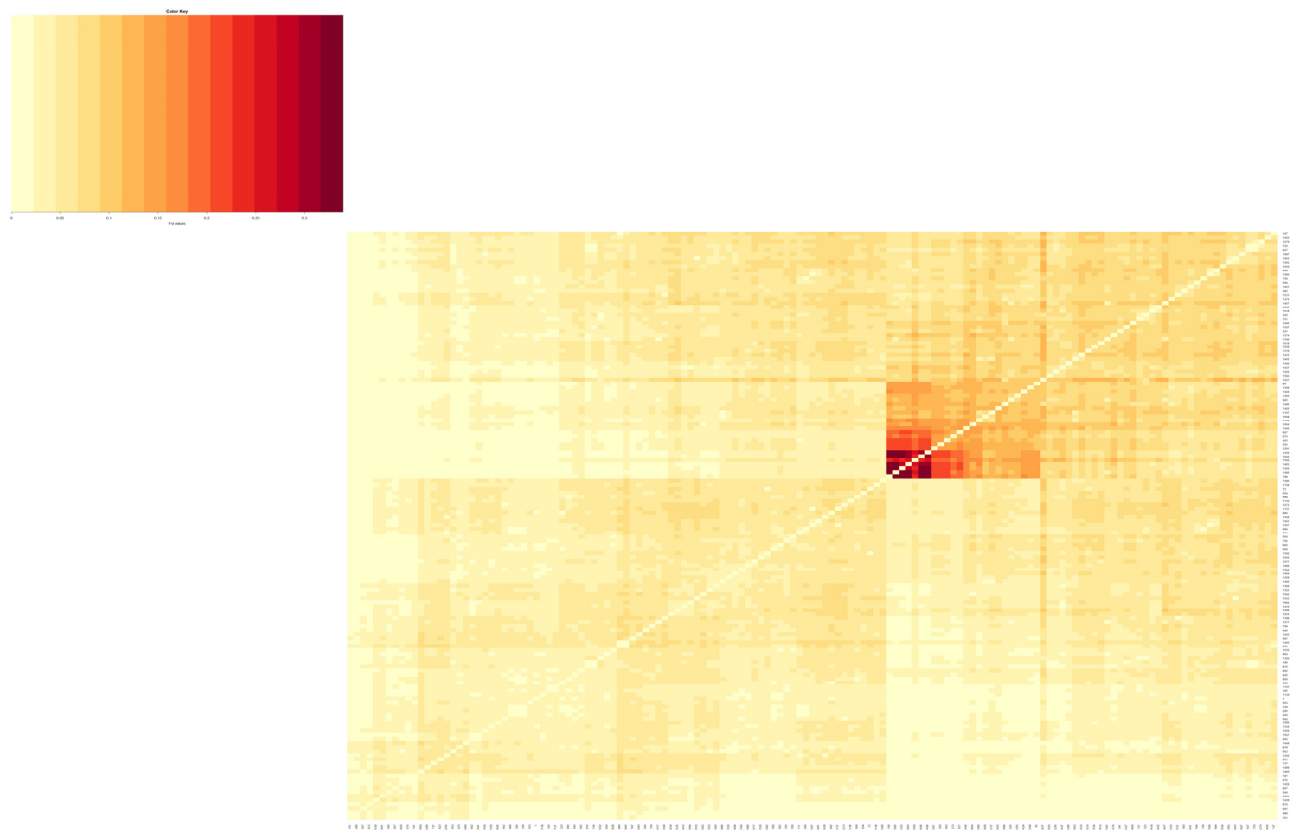

**Figure S3.** Heatmap based on pairwise  $F_{ST}$  coefficients between the herds of Red Mangalica breed. The color key legend ranging from yellowish to dark red represents the scale of  $F_{ST}$  coefficients from zero to onward. The x and y axis show herd name.

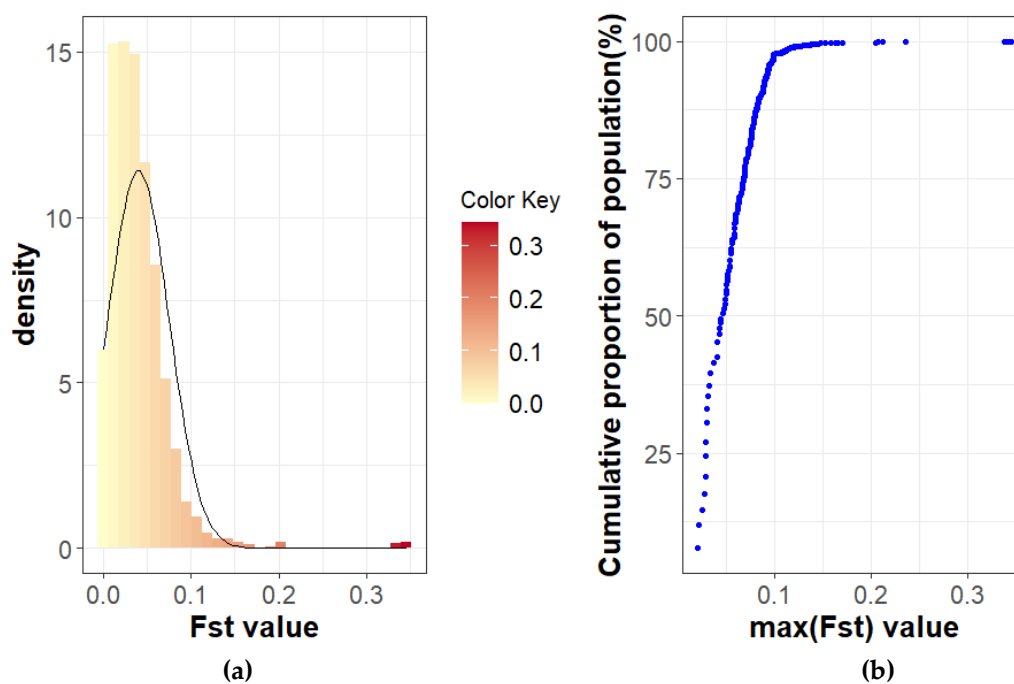

**Figure S4.**  $F_{ST}$  coefficients in the Blonde Mangalica total herds: (a) Histogram of  $F_{ST}$  values with density; (b) Cumulative proportion of population related to the  $\max F_{ST}$  of the herds.

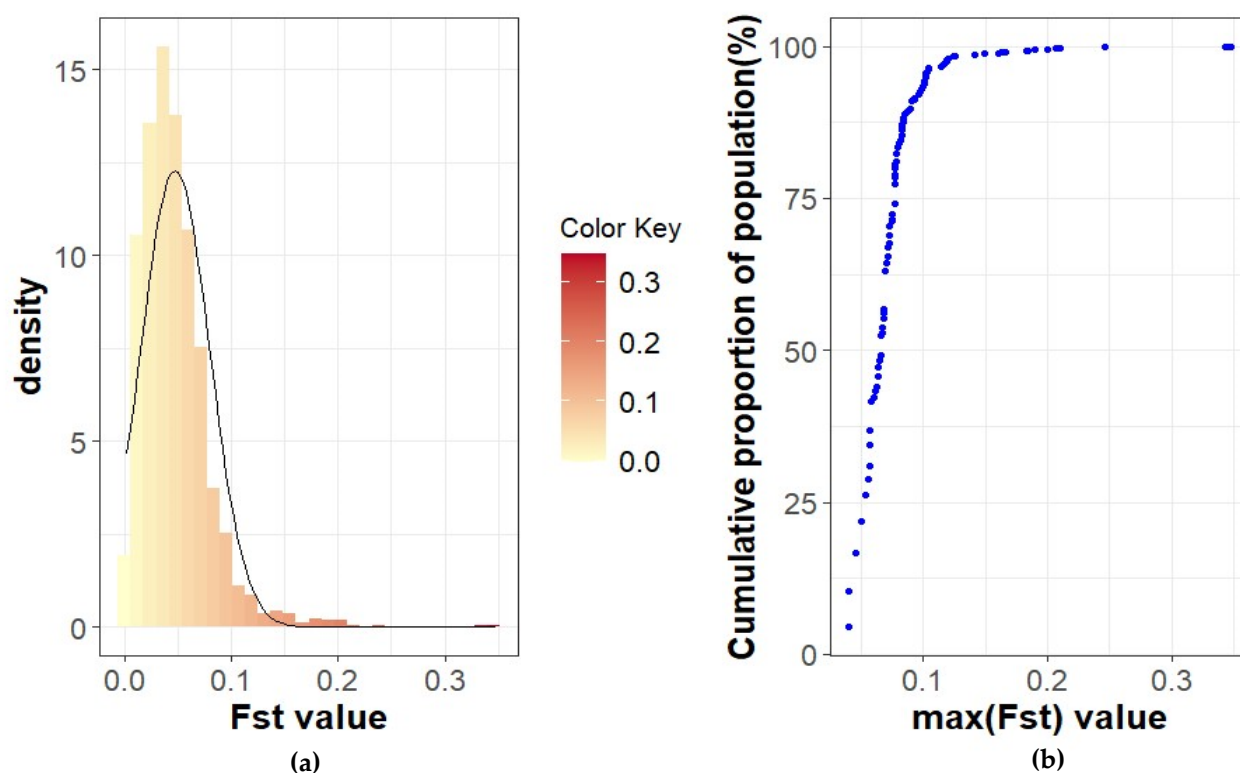

**Figure S5.**  $F_{ST}$  coefficients in the Swallow-Belly Mangalica total herds: (a) Histogram of  $F_{ST}$  values with density; (b) Cumulative proportion of population related to the  $\max F_{ST}$  of the herds.

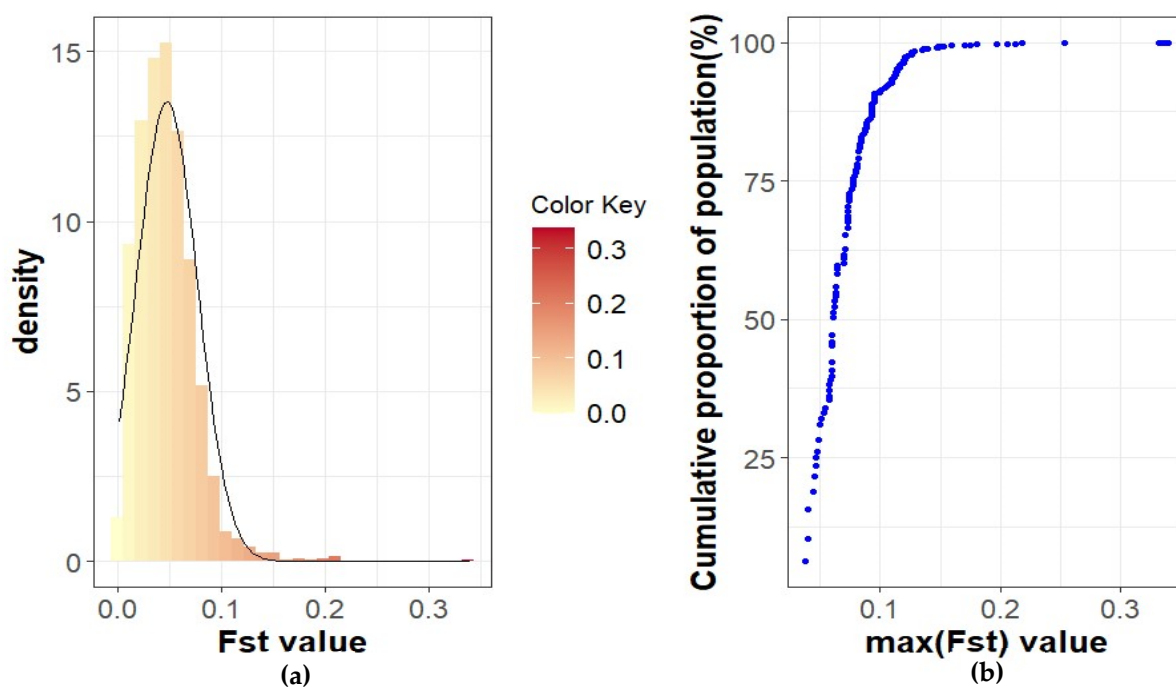

**Figure S6.**  $F_{ST}$  coefficients in the Red Mangalica total herds: (a) Histogram of  $F_{ST}$  values with density; (b) Cumulative proportion of population related to the  $\max F_{ST}$  of the herds.

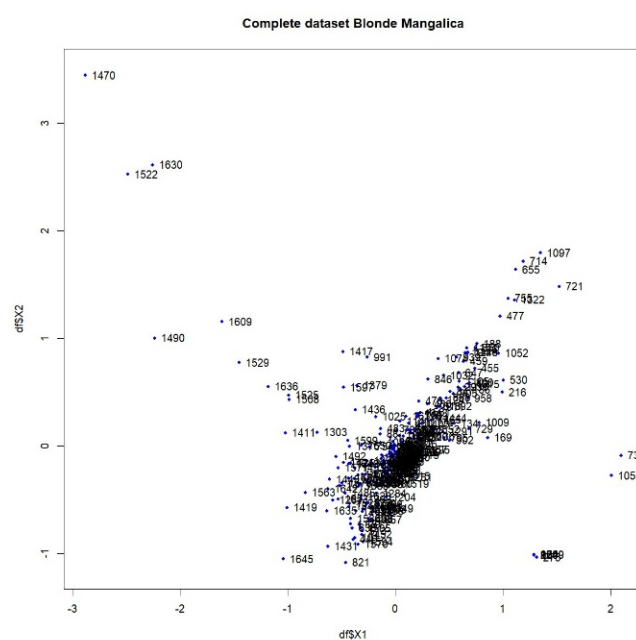

**Figure S7.** Multidimensional scaling (MDS) plot (MDS1&MDS2) of the Blonde Mangalica

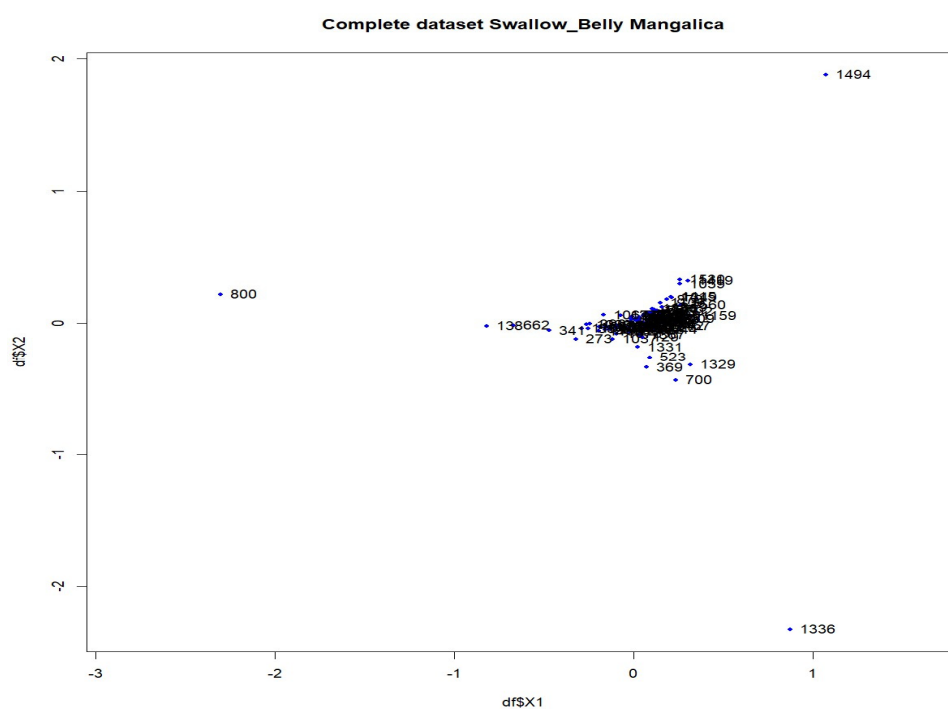

**Figure S8.** Multidimensional scaling (MDS) plot (MDS1&MDS2) of the Swallow-Belly Mangalica

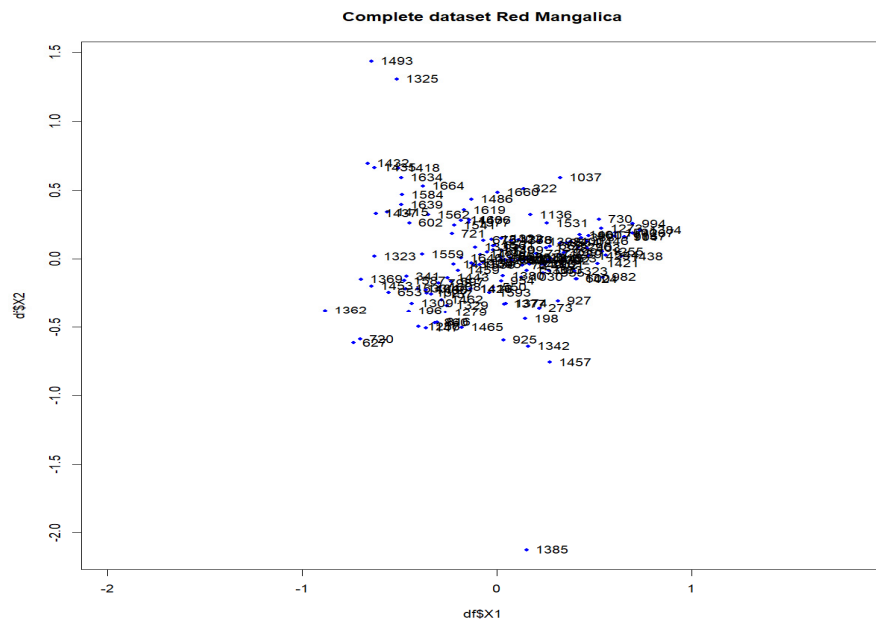

**Figure S9.** Multidimensional scaling (MDS) plot (MDS1&MDS2) of the Red Mangalica.

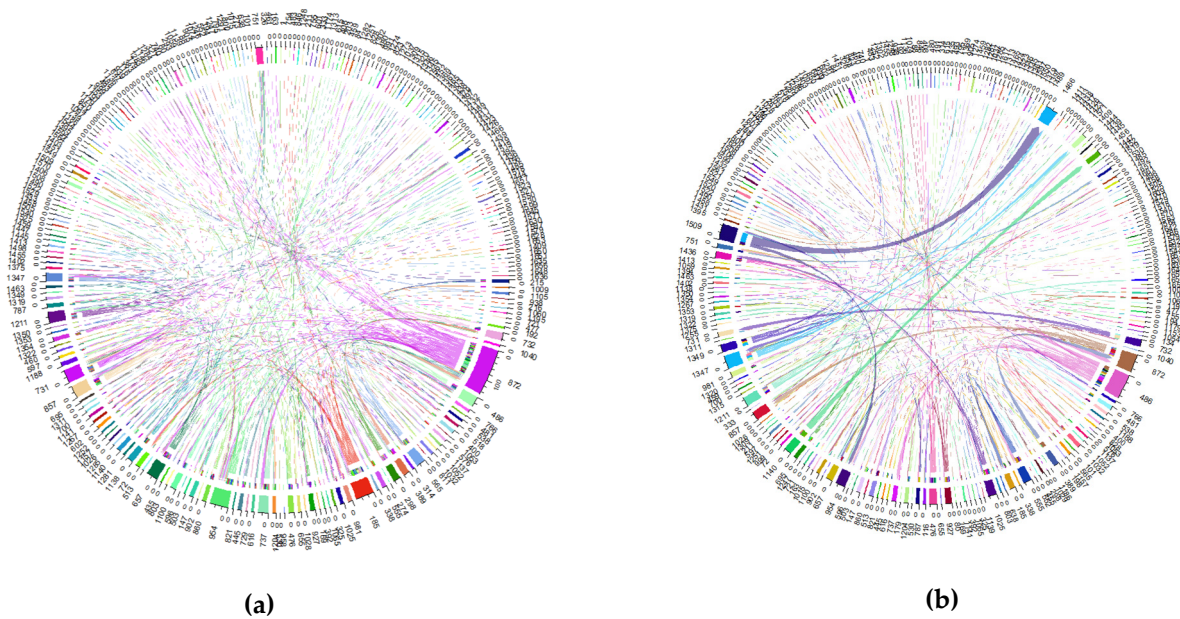

**Figure S10.** Migration of the Blonde Mangalica in total herds: (a) Male; (b) Female.



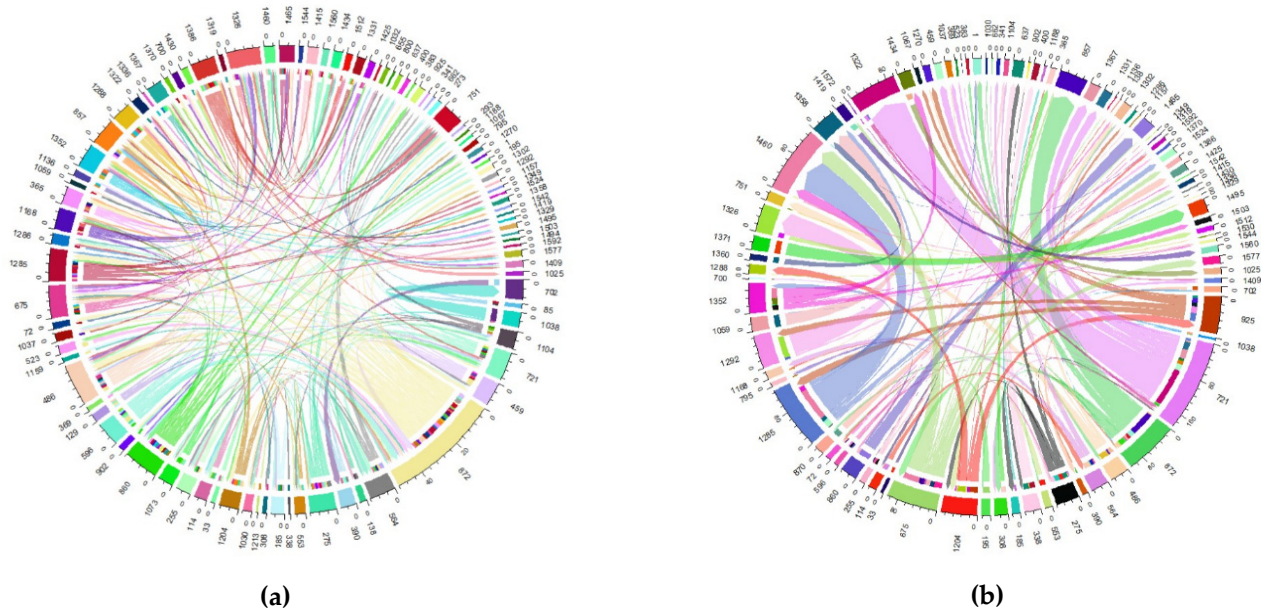

**Figure S11.** Migration of the Swallow-Belly in total herds: (a) Male; (b) Female.

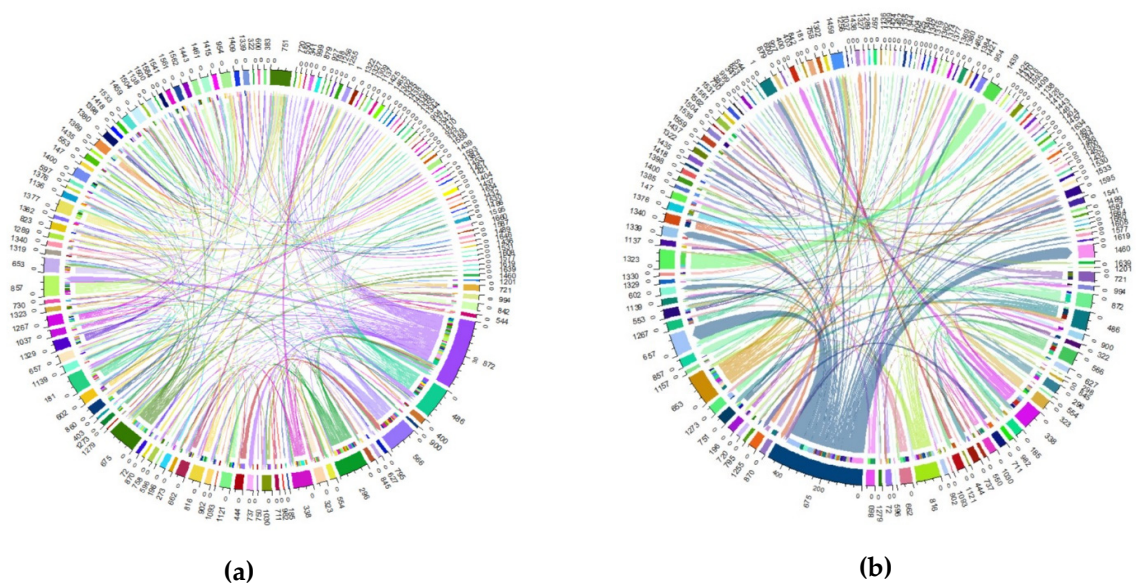

**Figure S12.** Migration of the Red in total herds: (a) Male; (b) Female.
